# Supplementary material for: Endotoxemia contributes to CD27+ memory B-cell apoptosis via enhanced sensitivity to Fas ligation in patients with Cirrhosis
Source: PubMed Central journal article supplement (PMC5114671; doi:10.1038/srep36862), 2016-11-18
Supplement: srep36862-s1.pdf [file srep36862-s1.pdf]

**Title: Endotoxemia contributes to CD27+ memory B-cell apoptosis via enhanced sensitivity to Fas ligation in patients with Cirrhosis**

**Authors:**

Li-Yuan Chang<sup>1,2</sup>, Yonghai Li<sup>1,2</sup>, David E. Kaplan<sup>1,2\*</sup>

<sup>1</sup>Medicine and Research Services, Corporal Michael J. Crescenz VA Medical Center,  
3900 Woodland Avenue, Philadelphia, PA 19104

<sup>2</sup>Division of Gastroenterology, Department of Medicine, University of Pennsylvania, 9<sup>th</sup>  
floor BRB, 421 Curie Blvd. Philadelphia, PA 19104

\* **Corresponding Author:** David E. Kaplan, MD MSc, Philadelphia VA Medical Center,  
Research Bldg 21, A402A, 3900 Woodland Avenue, Philadelphia, PA 19104, +1-215-  
823-5800 6729, [dakaplan@mail.med.upenn.edu](mailto:dakaplan@mail.med.upenn.edu)

## SUPPLEMENTARY MATERIAL

Supplemental Figure 1

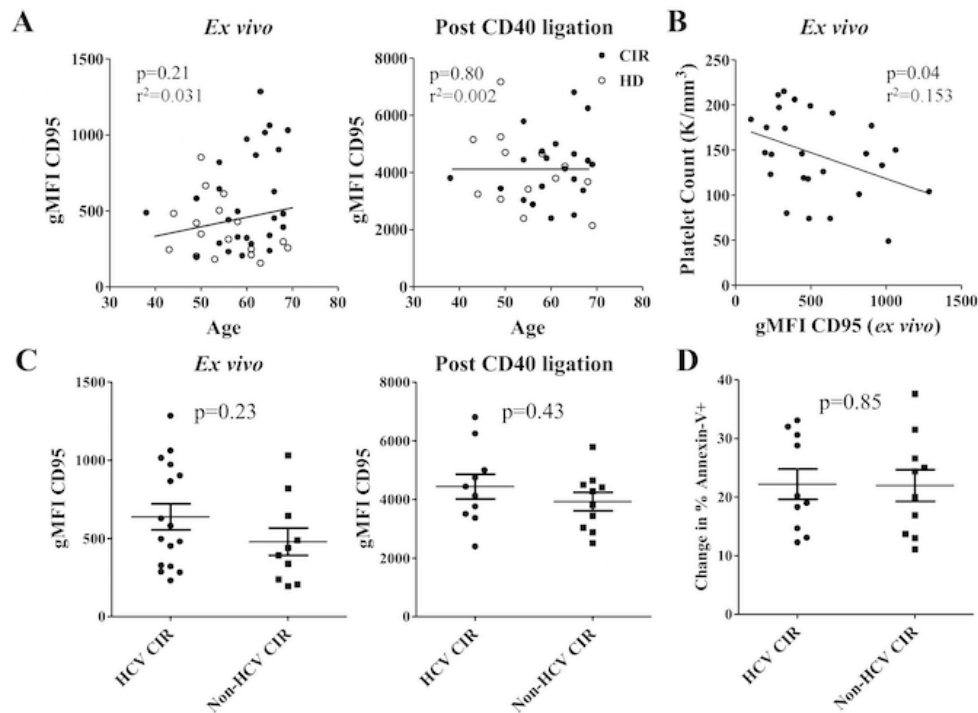

**Supplemental Figure 1. Age and cirrhosis etiology do not affect basal or activation induced CD95 expression.** (A) Spearman correlation of patient age and gMFI of CD95 in healthy donors (open circles) and cirrhotic patients (filled circles) *ex vivo* (left) and after CD40-mediated activation (right). (B) Spearman correlation of platelet count (K/mm<sup>3</sup>) and gMFI of CD95 *ex vivo*. (C) Comparison of gMFI of CD95 in hepatitis C- and non-viral-related cirrhosis *ex vivo* (left) and after CD40-mediated activation (center). p-value by Wilcoxon test. (D) Comparison of change in %Annexin-V<sup>+</sup> memory B-cells between viral- and non-viral cirrhosis after CD40-mediated activation (right). P-value by Wilcoxon test.

Supplemental Figure 2

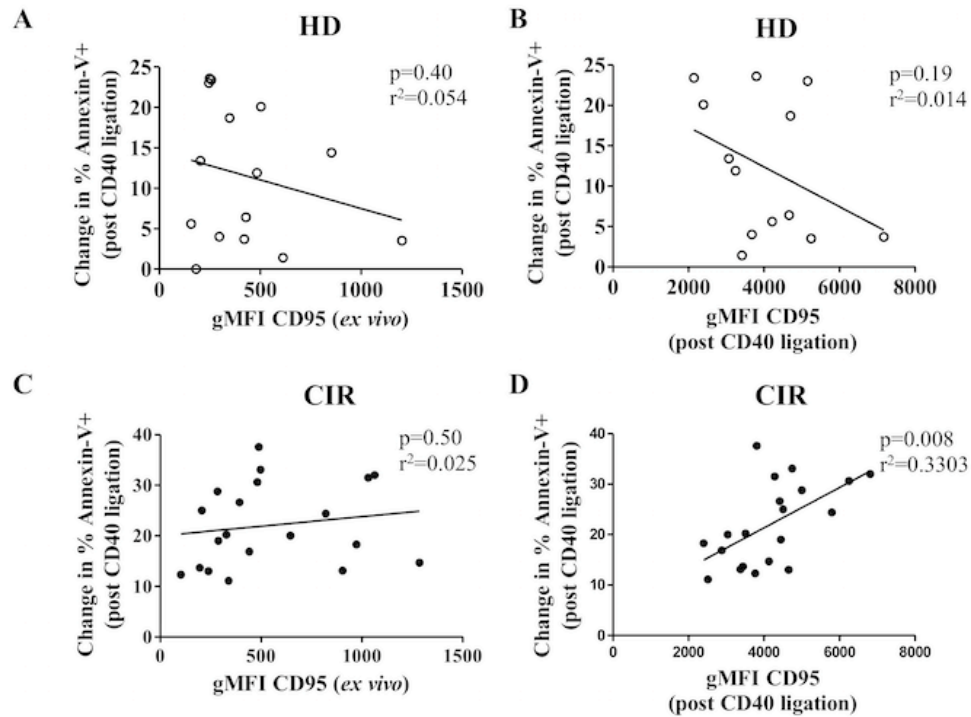

**Supplemental Figure 2. Sensitivity to Fas-mediated apoptosis correlates with post-activation rather than basal CD95 expression.** Spearman correlation of %Annexin-V<sup>+</sup> memory B-cells after Fas-exposure with (A) *ex vivo* Fas expression (gMFI of CD95) in healthy donors (HD), (B) post-CD40-activation Fas expression in healthy donors, (C) *ex vivo* Fas expression (gMFI of CD95) in cirrhotic patients (CIR), and (D) post-CD40-activation Fas expression in cirrhotic patients.

Supplemental Figure 3

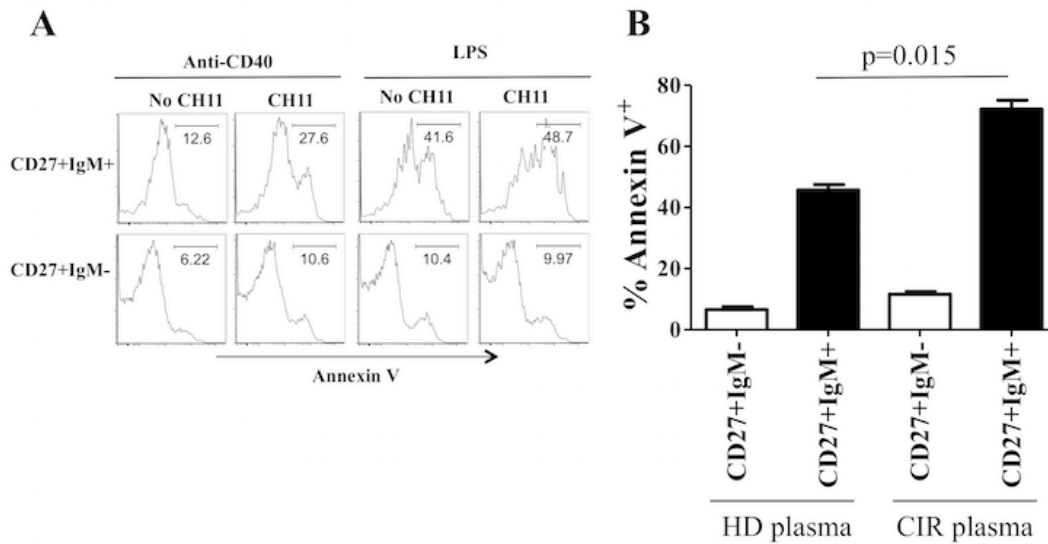

**Supplemental Figure 3. Sensitivity to Fas-mediated apoptosis among CD27<sup>+</sup>IgM<sup>+</sup> and CD27<sup>+</sup>IgM<sup>-</sup> B-cells.** (A) CIR CD27<sup>+</sup> B-cells were stimulated for 48h with either agonist anti-CD40 or LPS then incubated with anti-Fas (CH11) or control for 18h. Representative histograms showing Annexin-V expression in IgM<sup>+</sup> and IgM<sup>-</sup> subsets are shown. Representative data from 3 cirrhotic patients tested shown. (B) HD CD27<sup>+</sup> were isolated and incubated for 18h with either HD or CIR plasma. The percentage of CD27<sup>+</sup>IgM<sup>+</sup> and CD27<sup>+</sup>IgM<sup>-</sup> Annexin-V<sup>+</sup> cells are shown. P-value for difference between HD and CIR by Wilcoxon test.

Supplemental Figure 4

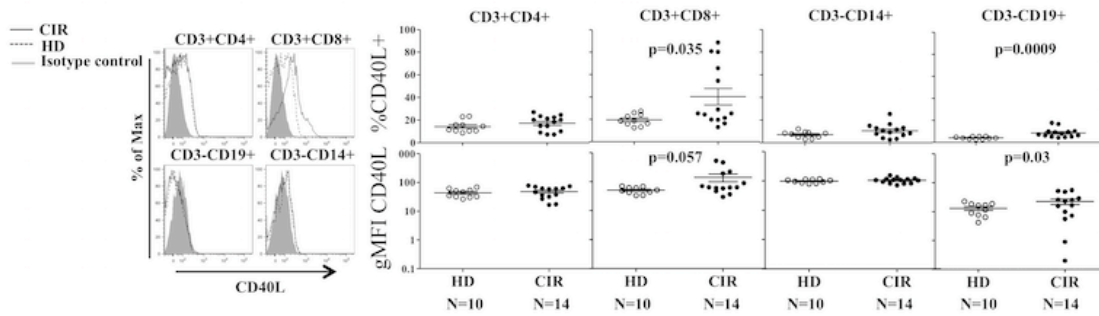

**Supplemental Figure 4. mCD40L expression on PBMC subsets.** Representative histograms and quantification of CD40L expression on CD3<sup>+</sup>CD4<sup>+</sup> cells, CD3<sup>+</sup>CD8<sup>+</sup> cells, CD3<sup>-</sup>CD14<sup>+</sup> cells and CD3<sup>-</sup>CD19<sup>+</sup> cells in HD and CIR.
